# Automated Expert-level Scleral Spur Detection and Quantitative Biometric Analysis on the ANTERION Anterior Segment OCT System

Kyle Bolo<sup>1</sup>, M.D., Galo Apolo<sup>1</sup>, M.S., Anmol A. Pardeshi<sup>1,2</sup>, M.S., Michael Chiang<sup>1</sup>, Ph.D., Bruce Burkemper<sup>1,2</sup>, Ph.D., Xiaobin Xie<sup>3</sup>, M.D., Alex S. Huang<sup>4</sup>, M.D., Ph.D., Martin Simonovsky<sup>5</sup>, Ph.D., and Benjamin Y. Xu<sup>1</sup>, M.D., Ph.D.

1. Roski Eye Institute, Department of Ophthalmology, Keck School of Medicine at the University of Southern California, Los Angeles, California
2. Department of Population and Public Health Sciences, Keck School of Medicine at the University of Southern California, Los Angeles, California
3. Eye Hospital of China Academy of Chinese Medical Sciences, Beijing, China
4. Hamilton Glaucoma Center, Shiley Eye Institute, Department of Ophthalmology, University of California, San Diego, La Jolla, California
5. Heidelberg Engineering, Heidelberg, Germany

**Corresponding Author:** Benjamin Xu, Department of Ophthalmology, Keck School of Medicine at the University of Southern California, 1450 San Pablo Street, 4th Floor, Suite 4700, Los Angeles, CA 90033  
Phone number: 323-442-6780; Fax number: 323-442-6412  
E-mail: [benjamin.xu@med.usc.edu](mailto:benjamin.xu@med.usc.edu)

## ABSTRACT

**Aim:** To perform an independent validation of deep learning (DL) algorithms for automated scleral spur detection and measurement of scleral spur-based biometric parameters in anterior segment optical coherence tomography (AS-OCT) images.

**Methods:** Patients receiving routine eye care underwent AS-OCT imaging using the ANTERION OCT system (Heidelberg Engineering, Heidelberg, Germany). Scleral spur locations were marked by three human graders (Reference, Expert, and Novice) and predicted using DL algorithms developed by Heidelberg Engineering that prioritize a false positive rate <4% (FPR4) or true positive rate >95% (TPR95). Performance of human graders and DL algorithms were evaluated based on agreement of scleral spur locations and biometric measurements with the Reference Grader.

**Results:** 1,308 AS-OCT images were obtained from 117 participants. Median differences in scleral spur locations from reference locations were significantly smaller ( $p < 0.001$ ) for the FPR4 ( $52.6 \pm 48.6 \mu\text{m}$ ) and TPR95 ( $55.5 \pm 50.6 \mu\text{m}$ ) algorithms compared to the Expert ( $61.1 \pm 65.7 \mu\text{m}$ ) and Novice ( $79.4 \pm 74.9 \mu\text{m}$ ) Graders. Inter-grader reproducibility of biometric measurements was excellent overall for all four (intraclass correlation coefficient [ICC] range 0.918-0.997). Inter-grader reproducibility of the Expert Grader [0.567-0.965] and DL algorithms [0.746-0.979] exceeded that of the Novice Grader [0.146-0.929] for images with narrow angles, defined as angle opening distance 500  $\mu\text{m}$  from the scleral spur (AOD500) <150  $\mu\text{m}$ .

**Conclusions:** DL algorithms on the ANTERION approximate expert-level measurement of scleral spur-based biometric parameters in an independent patient population. These algorithms could enhance clinical utility of AS-OCT imaging, especially for evaluating patients with angle closure and performing intraocular lens (IOL) calculations.

## KEY MESSAGES

**What is already known on this topic** – Deep learning (DL) algorithms can detect scleral spur locations in AS-OCT images with expert-level performance; however, there is sparse information about the accuracy of AS-OCT measurements associated with these predicted scleral spur locations.

**What this study adds** – DL algorithms on the ANTERION OCT system (Heidelberg Engineering, Heidelberg, Germany) approximate expert-level detection of the scleral spur and measurement of anterior segment biometric parameters in a real-world clinical cohort. Performance of the algorithms generally exceeds that of a novice grader.

**How this study might affect research, practice or policy** – The automation of scleral spur detection and quantitative biometric analysis overcomes the time- and expertise-dependent nature of AS-OCT imaging in the clinical setting. This technology provides clinicians with convenient access to data that could enhance care of patients with angle closure disease or patients receiving intraocular lens implantation.

## KEY WORDS

Anterior segment optical coherence tomography (AS-OCT), angle closure, narrow angles, anterior segment biometry, scleral spur, artificial intelligence, deep learning

79

## 80 INTRODUCTION

81 The biometric properties of the anterior segment and its anatomical structures play an important  
82 role in the clinical care of patients with a range of ocular conditions. Specifically, anterior  
83 segment biometrics play an important role in the pathogenesis of primary angle closure disease  
84 (PACD), in which aqueous humor outflow is impaired by apposition of the iris and trabecular  
85 meshwork, and closure of the anterior chamber angle (ACA).<sup>1-3</sup> This process leads to primary  
86 angle closure glaucoma (PACG), a major cause of visual morbidity worldwide that currently  
87 affects more than 20 million people.<sup>4,5</sup> In addition, the surgical treatment of eyes with cataract and  
88 high refractive error benefits from accurate biometric measurements when calculating the power  
89 and size of intraocular lenses (IOLs). Incorrect lens power leads to poor visual outcomes, and  
90 incorrect lens sizing can lead to harmful complications such as hyphema, uveitis, glaucomatous  
91 optic neuropathy, or corneal decompensation.<sup>6,7</sup>

92 There is growing evidence that supports the clinical utility of anterior segment optical  
93 coherent tomography (AS-OCT) for measuring anterior segment biometrics, many of which are  
94 based on scleral spur location. For example, angle opening distance (AOD) and trabecular iris  
95 space area (TISA), may find expanded roles in predicting progression of PACD and response to  
96 treatment with laser peripheral iridotomy (LPI).<sup>3,8,9</sup> Quantitative OCT-based methods could  
97 complement gonioscopy, which remains the current standard for assessing the ACA despite being  
98 subjective, qualitative, variably reproducible, and weakly correlated with AS-OCT measurements  
99 of angle width.<sup>10-16</sup> In IOL selection, biometric parameters, including corneal curvature, anterior  
100 chamber depth (ACD), and lens thickness (LT), are measured using optical or ultrasound methods  
101 and factored into modern IOL calculators.<sup>17</sup> Anterior chamber width (ACW), also referred to as  
102 white-to-white (WTW) distance, is important for sizing anterior chamber and phakic IOLs.<sup>18-21</sup>  
103 Biometric parameters based on scleral spur location, such as lens vault (LV) and anterior chamber

width (ACW), are potentially useful in IOL selection, but are difficult to measure and therefore rarely used in routine clinical practice.<sup>22,23</sup>

Full biometric analysis of AS-OCT images on commercial devices currently requires specialized software and manual marking of scleral spurs, which is expertise-dependent and time-consuming, thereby presenting a barrier to widespread implementation.<sup>24,25</sup> Prior studies have established the accuracy of scleral spur detection automated using deep learning (DL), a form of artificial intelligence.<sup>26,27</sup> In this study, we investigate if biometric measurements associated with scleral spur locations predicted by DL algorithms on the Heidelberg ANTERION version 1.4 swept-source OCT system (Heidelberg Engineering GmbH, Heidelberg, Germany) approximate inter-expert reproducibility in an independent patient population and clinical environment.

## **METHODS**

The study was approved by the University of Southern California (USC) Institutional Review Board. All study procedures adhered to the recommendations of the Declaration of Helsinki. Written informed consent was obtained from all participants.

### **Scleral spur detection algorithm**

DL algorithms to automate scleral spur detection were developed and tested internally by Heidelberg Engineering (Heidelberg, Germany) prior to this study. While these algorithms are proprietary, some information was provided by Heidelberg Engineering about their development. In brief, a set of 4,798 ANTERION AS-OCT images from one or both eyes of 360 patients were evaluated by an expert ophthalmologist to identify scleral spur locations. These images were divided into non-overlapping training (3,810 images; 80%) and test (979 images; 20%) datasets. The training dataset was used to train a convolutional neural network (CNN) based on the M2U-Net architecture that predicts scleral spur location within a predefined region of interest (ROI).<sup>28</sup> The ROI is a 256x256 pixel area around the ACA determined heuristically based on the posterior

boundary of the cornea and the anterior boundary of the iris as defined by the ANTERION's segmentation algorithms. Reference scleral spur locations were transformed into reference heatmaps containing a Gaussian function with standard deviation of 10 pixels centered on the reference location. Data augmentation, including affine deformations, noising, and blurring was used to increase the robustness of the CNN. The subpixel-refined position and intensity of the strongest peak in the predicted heatmap were used to estimate the position and confidence (level of certainty ranging from 0 to 1) of the scleral spur. The test dataset was used to select two operating points along the receiver operating characteristic (ROC) curve (Supplementary Figure 1) for further analysis, one more conservative to limit the false positive rate (FPR; scleral spur marked by the algorithm but not the ophthalmologist) below 4% (FPR4 algorithm) and the other more aggressive to ensure a true positive rate (TPR; scleral spur marked by the algorithm and ophthalmologist) above 95% (TPR95 algorithm).

#### **Acquisition and analysis of validation dataset**

Participants 18 years of age and older undergoing routine eye examinations were consecutively recruited from eye care facilities of the Roski Eye Institute at the University of Southern California (USC) and Doheny Eye Institute at the University of California Los Angeles (UCLA). Recruitment occurred from March 2021 to August 2021. Exclusion criteria included corneal opacities that precluded AS-OCT imaging and prior history of ocular trauma.

Anterior segment OCT imaging was performed using the ANTERION and Metrics Application. All images were obtained by trained technicians following a standardized imaging protocol. Imaging of both eyes was performed in the seated position prior to pupillary dilation in a dark room under standardized lighting conditions ( $<0.01$  lux) at the imaging plane. Participants were instructed to maintain fixation on the internal fixation target with their eyelids open without retraction by the technician.

The scleral spur was identified as the inward projection at the junction of the sclera and cornea.<sup>29</sup> Scleral spur locations in all six B-scans (separated by 30 degrees, creating 12 angle sectors at 0, 30, 60, 90, 120, 150, 180, 210, 240, 270, 300, and 330 degrees) were marked by three human graders: 1) an expert trained grader (AAP; Reference Grader) with experience marking over 40,000 scleral spurs after a 5-hour training period of marking 500 scleral spurs under the supervision of two glaucoma specialists; 2) an expert glaucoma specialist with experience marking over 10,000 scleral spurs (BYX; Expert Grader); 3) a novice trained grader (AS; Novice Grader) with experience marking fewer than 100 scleral spurs. The Reference Grader previously demonstrated low intra-grader variability in scleral spur locations and AS-OCT measurements of biometric parameters.<sup>27,30</sup> Scleral spur locations were also predicted by the FPR4 and TPR95 algorithms.

The anterior and posterior boundaries of the cornea and lens, and the anterior boundary of the iris were computed automatically by the ANTERION's segmentation algorithm. The Reference Grader made minor segmentation adjustments in fewer than 15 images (1.1% of total). After the scleral spurs were marked, eight scleral spur-based biometric parameters were measured in an automated fashion by the ANTERION software: angle opening distance (AOD), trabecular iris space area (TISA) and scleral spur angle (SSA) at 500 and 750  $\mu\text{m}$  from the scleral spur, anterior chamber width (ACW), and lens vault (LV). AOD500/750 were defined as the perpendicular distance from the TM at 500 or 750  $\mu\text{m}$  anterior to the scleral spur to the anterior iris surface. TISA500/750 were defined as the area bounded anteriorly by AOD500/750; posteriorly by a line drawn from the scleral spur perpendicular to the plane of the inner scleral wall to the opposing iris; superiorly by the inner corneoscleral wall; and inferiorly by the iris surface. SSA500/750 were defined as the angles formed by lines originating at the scleral spur and terminating at the TM or anterior iris surface 500 or 750  $\mu\text{m}$  anterior to the scleral spur. ACW was defined as the distance between scleral spurs. LV was defined as the perpendicular distance from the apex of the anterior lens surface to a line between scleral spurs.

A subset of images was classified as having narrow angles, defined as an AOD500 measurement below 150  $\mu\text{m}$  by the Reference Grader. This threshold was chosen to define narrow angles due to its high sensitivity and specificity for detecting gonioscopic angle closure.<sup>31</sup> Narrow angles was not defined based on gonioscopy for several reasons: 1) the majority of patients were not glaucoma patients and therefore did not receive gonioscopy; 2) there is intergrader variability in the detection of gonioscopic angle closure; 3) angle widths associated with gonioscopic angle closure vary significantly by quadrant.<sup>10,32 31</sup>

Images with borderline or poor interpretability due to eyelid and other imaging artifacts were included in the analysis so that false negative rates (FNRs) and false positive rates (FPRs) could be calculated for the Expert and Novice Graders and both DL algorithms. In addition, human graders were not provided specific instruction about what constituted a gradable scleral spur; the decision to grade an image was left to the discretion of each grader. A reference false negative ( $\text{FN}_{\text{ref}}$ ) was defined as a scleral spur identified by the Reference Grader but not by another grader or algorithm. A reference false positive ( $\text{FP}_{\text{ref}}$ ) was defined as a scleral spur marked by another grader or algorithm but not by the Reference Grader. A consensus false negative ( $\text{FN}_{\text{con}}$ ) was defined as a scleral spur marked by all three human graders but not by a DL algorithm. A consensus false positive ( $\text{FP}_{\text{con}}$ ) was defined as a scleral spur marked by a DL algorithm but not any of the three human graders.

## Statistical analysis

Scleral spur location differences were calculated as the Euclidean distance between scleral spur locations by the Reference Grader and second human grader or DL algorithm. Normality testing was performed on scleral spur location differences using the Kolmogorov-Smirnov test. Medians and interquartile ranges (IQRs) were calculated based on non-normality of the data. Scleral spur location differences were grouped by grader or algorithm and compared using the Kruskal-Wallis test. Pairwise comparisons of scleral spur location differences between groups (six comparisons



in total) were performed using the post-hoc Dunn's test adjusted for multiple comparisons at a significance level of 0.05. Intraclass correlation coefficients (ICCs) were calculated for each biometric parameter measured in all AS-OCT images to assess the inter-grader agreement between the Reference Grader and a second human grader (Expert or Novice) or DL algorithm (FPR4 and TPR95). ICCs were also calculated for each biometric parameter measured in a single sector (superior or temporal) of only one eye per participant to eliminate intra-eye and intra-participant correlations. Bland-Altman plots were generated for AOD500 to assess inter-grader agreement across the entire range of angle widths. All analyses were performed using the R statistical package (version 4.0.3) at a significance level of 0.05.

## RESULTS

In total, 1,308 AS-OCT images were obtained from 117 participants. Mean age was  $52.1 \pm 17.6$  years with 59 males (50.4%) and 58 females (49.6%). Among all participants, 50 (N = 42.7%) were Caucasian, 32 (27.4%) were Hispanic, 21 (17.9%) were Asian, and 7 (6.0%) were Black, and 7 (6.0%) had unknown race/ethnicity.

In total, the Reference Grader marked 1,504 spurs, the Expert Grader marked 1,726 spurs, the Novice Grader marked 1,622 spurs, the FPR4 algorithm marked 1,459 spurs, and the TPR95 algorithm marked 1,722 spurs. Distributions of scleral spur location differences compared to the Reference Grader varied by grader or algorithm (Figures 1 and 2). Median and interquartile range (IQR) of scleral spur location differences were  $61.1 \pm 65.7 \mu\text{m}$  for the Expert Grader,  $79.4 \pm 74.9 \mu\text{m}$  for the Novice Grader,  $52.6 \pm 48.6 \mu\text{m}$  for the FPR4 algorithm, and  $55.5 \pm 50.6 \mu\text{m}$  for the TPR95 algorithm. There were significant differences ( $p < 0.001$ ) among the 4 groups of scleral spur location differences. Pairwise comparisons demonstrated a non-significant difference in scleral spur location differences between the DL algorithms ( $p = 0.33$ ) and significant differences between all other pairs of graders and algorithms ( $p < 0.001$ ).

There was a wide range of angle widths (mean  $0.41 \pm 0.25$  mm) based on the distribution of AOD500 measurements by the Reference Grader (Supplementary Figure 2). Measurement agreement between the Reference Grader and the Expert Grader or either algorithm was excellent (ICC range 0.955 to 0.997) and similar for all parameters (Table 1). Measurement agreement for the Novice Grader was lower but still excellent for all parameters (ICC range 0.918 to 0.994). Bland-Altman plots for AOD500 reflected consistent agreement across the entire range of AOD500 measurements for all four (Figure 3). ICCs of measurements from only superior or temporal sectors from one eye per participants showed similar trends (Supplementary Tables 1 and 2) as the primary analysis.

**Table 1.** Human-human and human-machine reproducibility of measurements of scleral spur-based biometric parameters. Intraclass correlation coefficients (ICCs) with 95% confidence intervals comparing measurements from all sectors by the Reference Grader and a second human grader or DL algorithm.

|                | Expert Grader         | Novice Grader         | FPR4                  | TPR95                 |
|----------------|-----------------------|-----------------------|-----------------------|-----------------------|
| <b>ACW</b>     | 0.966 (0.962 - 0.970) | 0.943 (0.936 - 0.949) | 0.981 (0.979 - 0.984) | 0.976 (0.973 - 0.978) |
| <b>LV</b>      | 0.996 (0.995 - 0.996) | 0.994 (0.993 - 0.994) | 0.997 (0.997 - 0.998) | 0.997 (0.996 - 0.997) |
| <b>AOD500</b>  | 0.961 (0.957 - 0.965) | 0.925 (0.917 - 0.932) | 0.976 (0.974 - 0.979) | 0.973 (0.970 - 0.975) |
| <b>AOD750</b>  | 0.976 (0.973 - 0.978) | 0.950 (0.945 - 0.955) | 0.981 (0.979 - 0.983) | 0.977 (0.975 - 0.979) |
| <b>TISA500</b> | 0.965 (0.961 - 0.968) | 0.918 (0.909 - 0.926) | 0.980 (0.977 - 0.982) | 0.976 (0.974 - 0.979) |
| <b>TISA750</b> | 0.974 (0.971 - 0.977) | 0.934 (0.926 - 0.94)  | 0.984 (0.982 - 0.986) | 0.981 (0.979 - 0.983) |
| <b>SSA500</b>  | 0.955 (0.95 - 0.959)  | 0.928 (0.92 - 0.935)  | 0.970 (0.967 - 0.973) | 0.968 (0.964 - 0.971) |
| <b>SSA750</b>  | 0.969 (0.966 - 0.972) | 0.945 (0.939 - 0.95)  | 0.979 (0.976 - 0.981) | 0.973 (0.971 - 0.976) |

ACW, Anterior Chamber Width. LV, Lens Vault. AOD500/750, Anterior Opening Distance 500/750  $\mu$ m from the scleral spur. TISA500/750, Trabecular Iris Space Area 500/750  $\mu$ m from the scleral spur. SSA500/750, Scleral Spur Angle 500/750  $\mu$ m from the scleral spur.

251

252 Among the 1,504 AS-OCT images graded by the Reference Grader, 198 (13.2%) had  
 253 narrow angles. Among measurements from these images, ICCs for ACW and LV were similar  
 254 (ICC range 0.856 to 0.979) whereas ICCs for angle width measurements tended to be lower (ICC  
 255 range 0.146 to 0.878), primarily due to lower overall variance among the smaller angle width  
 256 measurements. The differences between Expert and Novice Graders were more pronounced, and  
 257 the DL algorithms still matched if not exceeded inter-expert agreement (Table 2). Bland-Altman  
 258 plots for AOD500 demonstrated consistent intra-grader reproducibility, even below the 150  $\mu$ m  
 259 threshold for narrow angles (Figure 3).

260

261 **Table 2.** Human-human and human-machine reproducibility of measurements of scleral spur-  
 262 based biometric parameters in narrow angles (AOD500 less than 150  $\mu$ m). Intraclass correlation  
 263 coefficients (ICCs) with 95% confidence intervals comparing measurements from all sectors by  
 264 the Reference Grader and a second human grader or DL algorithm.

265

|         | Expert Grader         | Novice Grader          | FPR4                  | TPR95                 |
|---------|-----------------------|------------------------|-----------------------|-----------------------|
| ACW     | 0.931 (0.907 - 0.949) | 0.856 (0.807 - 0.894)  | 0.972 (0.958 - 0.981) | 0.959 (0.944 - 0.970) |
| LV      | 0.965 (0.952 - 0.975) | 0.929 (0.904 - 0.949)  | 0.979 (0.970 - 0.986) | 0.973 (0.963 - 0.981) |
| AOD500  | 0.548 (0.435 - 0.644) | 0.146 (-0.002 - 0.288) | 0.777 (0.699 - 0.836) | 0.746 (0.668 - 0.807) |
| AOD750  | 0.764 (0.698 - 0.817) | 0.528 (0.416 - 0.623)  | 0.861 (0.812 - 0.898) | 0.821 (0.767 - 0.863) |
| TISA500 | 0.762 (0.682 - 0.824) | 0.267 (0.105 - 0.416)  | 0.852 (0.790 - 0.897) | 0.796 (0.721 - 0.852) |
| TISA750 | 0.792 (0.721 - 0.847) | 0.257 (0.094 - 0.406)  | 0.878 (0.826 - 0.916) | 0.824 (0.759 - 0.873) |
| SSA500  | 0.567 (0.458 - 0.660) | 0.219 (0.073 - 0.355)  | 0.782 (0.706 - 0.841) | 0.750 (0.673 - 0.811) |
| SSA750  | 0.765 (0.699 - 0.818) | 0.574 (0.469 - 0.662)  | 0.854 (0.803 - 0.893) | 0.816 (0.761 - 0.859) |

266

267 ACW, Anterior Chamber Width. LV, Lens Vault. AOD500/750, Anterior Opening Distance  
 268 500/750  $\mu$ m from the scleral spur. TISA500/750, Trabecular Iris Space Area 500/750  $\mu$ m from  
 269 the scleral spur. SSA500/750, Scleral Spur Angle 500/750  $\mu$ m from the scleral spur.

270

Rates of  $FN_{ref}$  and  $FP_{ref}$  differed by grader and algorithm (Figure 4). The Expert and Novice Graders and TPR95 algorithm all had  $FNR_{ref} < 3.0\%$  and  $FPR_{ref} > 10.0\%$  whereas the FPR4 algorithm had  $FNR_{ref} = 12.6\%$  and  $FPR_{ref} = 9.6\%$ . Compared to the consensus, the  $FNR_{con}$  of the FPR4 algorithm was higher than the TPR95 algorithm (12.3% vs 2.7%) whereas the difference in the  $FPR_{con}$  was smaller (1.1% vs. 4.1%). On visual inspection of misclassified images by the TPR95 algorithm, many of the images had obvious lid, shadowing, or motion artifacts that make scleral spur detection difficult (Supplementary Figure 3).

## DISCUSSION

In this study, DL algorithms for the ANTERION OCT system achieved expert-level performance predicting scleral spur locations and measurements of scleral spur-based biometric parameters in a large set of AS-OCT images from an independent patient population and clinical environment. Both the conservative (FPR4) and aggressive (TPR95) algorithms generally approximated the performance of the Expert Grader and exceeded that of the Novice Grader, especially among images with narrow angles. The TPR95 algorithm more closely approximated the FNR and FPR of the human graders, while the FPR4 algorithm made substantially fewer predictions. These findings support the implementation of the TPR95 algorithm for scleral spur detection and automated biometric analysis of ANTERION images, which in turn could greatly enhance the accessibility and utility of quantitative AS-OCT imaging.

Measurements of scleral spur-based biometric parameters are dependent on accurate identification of scleral spur location, which is variable even among experienced graders.<sup>24,25</sup> Both the FPR4 and TPR95 algorithms produced similar accuracy in predicting scleral spur locations relative to the Reference Grader, with median differences that were smaller than those of the Expert and Novice Graders ( $<60 \mu m$  for both algorithms). This performance is comparable to that of a DL algorithm developed by Xu et al. for the Tomey CASIA SS-1000, in which the mean human-machine scleral spur location difference was  $73.08 \pm 52.06 \mu m$ .<sup>27</sup> Pham et al.

developed a different DL algorithm for the CASIA SS-1000 and plots of human-human and human-machine differences are on a similar scale to those from this study.<sup>26</sup> These findings suggest that the FPR4 and TPR95 algorithms achieve expert-level performance in scleral spur detection that approximates if not exceeds the agreement between two experienced graders.

Limited access to quantitative measurements of scleral spur-based biometric parameters has hindered the development and implementation of novel clinical methods for evaluating and treating a range of ocular conditions, including PACD, refractive error, and cataract. Our findings suggest that biometric measurements associated with scleral spur predictions by both algorithms are highly correlated with measurements by the Reference Grader and approximate the agreement between two experienced human graders, including in eyes with narrow angles. An automated method that provides access to expert-level measurements of scleral spur-based biometric measurements could help modernize the clinical evaluation and management of patients with PACD. Measurements of AOD and TISA are associated with IOP and anatomical variations in PACD eyes and may predict a higher risk of PACD progression or poor angle widening after LPI.<sup>8,15,16</sup> In addition, automated measurements of ACW and LV could be beneficial for IOL selection: ACW is helpful in sizing anterior chamber and phakic IOLs, and there is evidence that LV could play an important role in determining effective lens position and calculating IOL power.<sup>18–23</sup>

Our results demonstrate that rates of scleral spur detection are highly variable under real-world conditions without eyelid retraction during imaging, even among experienced graders. This point, which has not been previously studied, suggests there is differing confidence among graders when deciding whether to mark a scleral spur. Based on number of scleral spurs marked, the Reference Grader appeared the most conservative and the Expert Grader the most aggressive among human graders. The TPR95 algorithm approximated the FNR and FPR of the Expert Grader (1.0% and 15.8% vs. 2.9% and 17.4%). While the more conservative FPR4 algorithm had a lower FPR compared to the TPR95 algorithm (9.6% vs. 17.4%), this came at the expense of a

higher FNR (12.6% vs. 2.9%). Despite the greater number of scleral spurs identified by the TPR95 algorithm, measurement agreement between the Reference Grader and both algorithms were similar. In a busy clinical environment, the higher TPR of the TPR95 algorithm is likely of greater utility than the lower FPR of the FPR4 algorithm as it is more convenient to ignore a questionably marked scleral spur than to manually mark a more obvious one.

Our study has several strengths compared to prior studies on automated scleral spur detection.<sup>26,27</sup> First, the DL algorithms maintained expert-level performance in a diverse patient cohort and real-world clinical environment that was completely independent from the cohort and environment in which the algorithm was developed. These findings support the generalizability and widespread implementation of DL algorithms in diverse practice settings, while prior studies that used smaller and more homogenous cohorts do not.<sup>26,27</sup> Second, images with eyelid or other imaging artifacts were not omitted from in the validation dataset. This approach allowed us to assess variability in human grader and algorithm confidence in scleral spur detection and evaluate its effect on detection rates and measurement agreement. It also avoids introducing biases associated with analyzing only a subset of images and applying arbitrary definitions of image quality that may be difficult in real-world practice environments. Third, all images were graded by a novice grader in addition to a second expert grader, which allowed us to determine that there is a benefit to using DL algorithms over a trained but inexperienced grader.

Our study also has several limitations. First, the Reference Grader was relatively conservative and marked fewer images than the other human graders and TPR95 algorithm. Second, while the overall number of images analyzed was large, there were fewer images and subsequently wider ICC confidence intervals in sub-analyses that accounted for angle width and intra- and inter-eye correlations. In the future, a larger cohort would be beneficial for a more detailed study of measurements from individual sectors of the eye. Third, the described algorithms are only available for images acquired on the ANTERION OCT system, and their

expert-level performance would likely not generalize to images acquired on other AS-OCT devices.

In conclusion, DL algorithms provide expert-level scleral spur detection and biometric analysis in a large set of AS-OCT images from a diverse clinical cohort. There appears to be a benefit to using the TPR95 algorithm compared to grading by a novice in terms of the number of scleral spurs identified and the accuracy of biometric measurements. This study supports the implementation of the TPR95 algorithm in diverse patient populations and real-world practice settings, which could help expand the clinical utility of AS-OCT imaging and modernize the care of ocular conditions dependent on accurate anterior segment biometry.

## ACKNOWLEDGEMENTS

This work was supported by grant K23 EY029763 from the National Eye Institute, National Institute of Health, Bethesda, Maryland and an unrestricted grant to the Department of Ophthalmology from Research to Prevent Blindness, New York, NY.

## DISCLOSURES

K.B., G.A., A.A.P., B.B., and X.X. have no relevant financial disclosures. B.Y.X. and A.S.H. receive research support from Heidelberg Engineering. M.S. is employed by Heidelberg Engineering.

## REFERENCES

1. Weinreb RN, Aung T, Medeiros FA. The pathophysiology and treatment of glaucoma: a review. *JAMA*. 2014;311(18):1901-1911. doi:10.1001/JAMA.2014.3192

- 372 2. Foster PJ, Buhrmann R, Quigley HA, Johnson GJ. The definition and classification of  
373 glaucoma in prevalence surveys. *Br J Ophthalmol*. 2002;86(2):238-242.  
374 doi:10.1136/BJO.86.2.238
- 375 3. Shan J, DeBoer C, Xu BY. Anterior Segment Optical Coherence Tomography:  
376 Applications for Clinical Care and Scientific Research. *Asia Pac J Ophthalmol (Phila)*.  
377 2019;8(2):146-157. doi:10.22608/APO.201910
- 378 4. Quigley H, Broman AT. The number of people with glaucoma worldwide in 2010 and  
379 2020. *British Journal of Ophthalmology*. 2006;90(3):262-267.  
380 doi:10.1136/bjo.2005.081224
- 381 5. Tham YC, Li X, Wong TY, Quigley HA, Aung T, Cheng CY. Global prevalence of  
382 glaucoma and projections of glaucoma burden through 2040: A systematic review and  
383 meta-analysis. *Ophthalmology*. 2014;121(11):2081-2090.  
384 doi:10.1016/j.opht.2014.05.013
- 385 6. Durr GM, Ahmed IIK. Intraocular Lens Complications: Decentration, Uveitis-Glaucoma-  
386 Hyphema Syndrome, Opacification, and Refractive Surprises. *Ophthalmology*.  
387 2021;128(11):e186-e194. doi:10.1016/J.OPHTHA.2020.07.004
- 388 7. Shen JF, Deng S, Hammersmith KM, et al. Intraocular Lens Implantation in the Absence  
389 of Zonular Support: An Outcomes and Safety Update: A Report by the American  
390 Academy of Ophthalmology. *Ophthalmology*. 2020;127(9):1234-1258.  
391 doi:10.1016/J.OPHTHA.2020.03.005
- 392 8. Xu BY, Friedman DS, Foster PJ, et al. Ocular Biometric Risk Factors for Progression of  
393 Primary Angle Closure Disease: The Zhongshan Angle Closure Prevention Trial.  
394 *Ophthalmology*. Published online October 8, 2021. doi:10.1016/j.opht.2021.10.003
- 395 9. Xu BY, Friedman DS, Foster PJ, et al. Anatomic Changes and Predictors of Angle  
396 Widening after Laser Peripheral Iridotomy: The Zhongshan Angle Closure Prevention  
397 Trial. *Ophthalmology*. 2021;128(8):1161-1168. doi:10.1016/J.OPHTHA.2021.01.021



- 398 10. Phu J, Wang H, Khuu SK, et al. Anterior Chamber Angle Evaluation Using Gonioscopy:  
399 Consistency and Agreement between Optometrists and Ophthalmologists. *Optom Vis Sci*.  
400 2019;96(10):751-760. doi:10.1097/OPX.0000000000001432
- 401 11. Chiang M, Guth D, Pardeshi AA, et al. Glaucoma Expert-Level Detection of Angle  
402 Closure in Goniophotographs With Convolutional Neural Networks: The Chinese  
403 American Eye Study. *Am J Ophthalmol*. 2021;226:100-107.  
404 doi:10.1016/J.AJO.2021.02.004
- 405 12. Pardeshi AA, Song AE, Lazkani N, Xie X, Huang A, Xu BY. Intradevice Repeatability  
406 and Interdevice Agreement of Ocular Biometric Measurements: A Comparison of Two  
407 Swept-Source Anterior Segment OCT Devices. *Transl Vis Sci Technol*. 2020;9(9):1-9.  
408 doi:10.1167/TVST.9.9.14
- 409 13. Fukuda S, Kawana K, Yasuno Y, Oshika T. Repeatability and reproducibility of anterior  
410 ocular biometric measurements with 2-dimensional and 3-dimensional optical coherence  
411 tomography. *J Cataract Refract Surg*. 2010;36(11):1867-1873.  
412 doi:10.1016/J.JCRS.2010.05.024
- 413 14. Baskaran M, Iyer J v., Narayanaswamy AK, et al. Anterior segment imaging predicts  
414 incident gonioscopic angle closure. *Ophthalmology*. 2015;122(12):2380-2384.  
415 doi:10.1016/j.ophtha.2015.07.030
- 416 15. Randhawa J, Chiang M, Porporato N, et al. Generalisability and performance of an OCT-  
417 based deep learning classifier for community-based and hospital-based detection of  
418 gonioscopic angle closure. *Br J Ophthalmol*. Published online October 20,  
419 2021:bjophthalmol-2021-319470. doi:10.1136/BJOPHTHALMOL-2021-319470
- 420 16. Porporato N, Tun TA, Baskaran M, et al. Towards “automated gonioscopy”: a deep  
421 learning algorithm for 360° angle assessment by swept-source optical coherence  
422 tomography. *Br J Ophthalmol*. Published online 2021. doi:10.1136/BJOPHTHALMOL-  
423 2020-318275

- 424 17. Kane JX, Chang DF. Intraocular Lens Power Formulas, Biometry, and Intraoperative  
425 Aberrometry: A Review. *Ophthalmology*. 2021;128(11):e94-e114.  
426 doi:10.1016/J.OPHTHA.2020.08.010
- 427 18. Bruner C, Skanchy DF, Wooten JP, Chuang AZ, Kim G. Anterior chamber lens sizing:  
428 Comparison of white-to-white and scleral spur-to-scleral spur methods. *J Cataract Refract*  
429 *Surg*. 2020;46(1):95-101. doi:10.1016/J.JCRS.2019.08.043
- 430 19. Deshpande K, Shroff R, Biswas P, et al. Phakic intraocular lens: Getting the right size.  
431 *Indian J Ophthalmol*. 2020;68(12):2880-2887. doi:10.4103/IJO.IJO\_2326\_20
- 432 20. Montés-Micó R, Tañá-Rivero P, Aguilar-Córcoles S, Ruiz-Santos M, Rodríguez-Carrillo  
433 MD, Ruiz-Mesa R. Angle-to-angle and spur-to-spur distance analysis with high-resolution  
434 optical coherence tomography. *Eye Vis (Lond)*. 2020;7(1). doi:10.1186/S40662-020-  
435 00208-0
- 436 21. Nemeth G, Hassan Z, Szalai E, Berta A, Modis L. Comparative analysis of white-to-white  
437 and angle-to-angle distance measurements with partial coherence interferometry and  
438 optical coherence tomography. *J Cataract Refract Surg*. 2010;36(11):1862-1866.  
439 doi:10.1016/J.JCRS.2010.05.017
- 440 22. Takagi Y, Kojima T, Nishida T, Nakamura T, Ichikawa K. Prediction of anterior chamber  
441 volume after implantation of posterior chamber phakic intraocular lens. *PLoS One*.  
442 2020;15(11). doi:10.1371/JOURNAL.PONE.0242434
- 443 23. Yan C, Yao K. Effect of Lens Vault on the Accuracy of Intraocular Lens Calculation  
444 Formulas in Shallow Anterior Chamber Eyes. *Am J Ophthalmol*. 2021;233:57-67.  
445 doi:10.1016/J.AJO.2021.07.011
- 446 24. Maram J, Pan X, Sadda S, Francis B, Marion K, Chopra V. Reproducibility of angle  
447 metrics using the time-domain anterior segment optical coherence tomography: intra-  
448 observer and inter-observer variability. *Curr Eye Res*. 2015;40(5):496-500.  
449 doi:10.3109/02713683.2014.930155

450 25. Kim DY, Sung KR, Kang SY, et al. Characteristics and reproducibility of anterior  
451 chamber angle assessment by anterior-segment optical coherence tomography. *Acta*  
452 *Ophthalmol.* 2011;89(5):435-441. doi:10.1111/J.1755-3768.2009.01714.X

453 26. Pham TH, Devalla SK, Ang A, et al. Deep learning algorithms to isolate and quantify the  
454 structures of the anterior segment in optical coherence tomography images. *British*  
455 *Journal of Ophthalmology.* 2020;105(9). doi:10.1136/bjophthalmol-2019-315723

456 27. Xu BY, Chiang M, Pardeshi AA, Moghimi S, Varma R. Deep Neural Network for Scleral  
457 Spur Detection in Anterior Segment OCT Images: The Chinese American Eye Study.  
458 *Transl Vis Sci Technol.* 2020;9(2):1-10. doi:10.1167/TVST.9.2.18

459 28. Laibacher T, Weyde T, Jalali S. M2U-Net: Effective and Efficient Retinal Vessel  
460 Segmentation for Resource-Constrained Environments. Published online November 19,  
461 2018. Accessed December 9, 2021. <https://arxiv.org/abs/1811.07738v3>

462 29. Ho SW, Baskaran M, Zheng C, et al. Swept source optical coherence tomography  
463 measurement of the iris-trabecular contact (ITC) index: a new parameter for angle closure.  
464 *Graefe's archive for clinical and experimental ophthalmology = Albrecht von Graefes*  
465 *Archiv fur klinische und experimentelle Ophthalmologie.* 2013;251(4):1205-1211.  
466 doi:10.1007/S00417-012-2158-6

467 30. Xu BY, Burkemper B, Lewinger JP, et al. Correlation between Intraocular Pressure and  
468 Angle Configuration Measured by OCT: The Chinese American Eye Study. *Ophthalmol*  
469 *Glaucoma.* 2018;1(3):158-166. doi:10.1016/J.OGLA.2018.09.001

470 31. Narayanaswamy A, Sakata LM, He MG, et al. Diagnostic performance of anterior  
471 chamber angle measurements for detecting eyes with narrow angles: an anterior segment  
472 OCT study. *Arch Ophthalmol.* 2010;128(10):1321-1327.  
473 doi:10.1001/ARCHOPHTHALMOL.2010.231

32. Xu BY, Pardeshi AA, Burkemper B, et al. Differences in Anterior Chamber Angle Assessments Between Gonioscopy, EyeCam, and Anterior Segment OCT: The Chinese American Eye Study. *Transl Vis Sci Technol.* 2019;8(2). doi:10.1167/TVST.8.2.5

## TABLE AND FIGURE CAPTIONS

**Figure 1.** Human-human and human-machine differences in scleral spur locations. Scatter plots showing X- and Y-coordinate errors in comparison to the Reference Grader for the Expert Grader (top left), Novice Grader (bottom left), FPR4 algorithm (top right) and TPR95 algorithm (bottom right). Red dots indicate median X- and Y-coordinate differences.

**Figure 2.** Human-human and human-machine differences in scleral spur locations. Histograms showing the Euclidean distance between scleral spur locations by the Reference Grader and Expert Grader (top left), Novice Grader (bottom left), FPR4 algorithm (top right) and TPR95 algorithm (bottom right).

**Table 1.** Human-human and human-machine reproducibility of measurements of scleral spur-based biometric parameters. Intraclass correlation coefficients (ICCs) with 95% confidence intervals comparing measurements from all sectors by the Reference Grader and a second human grader or DL algorithm.

**Table 2.** Human-human and human-machine reproducibility of measurements of scleral spur-based biometric parameters in narrow angles (AOD500 less than 150  $\mu\text{m}$ ). Intraclass correlation coefficients (ICCs) with 95% confidence intervals comparing measurements from all sectors by the Reference Grader and a second human grader or DL algorithm.

**Figure 3.** Bland-Altman plots of human-human and human-machine comparisons of AOD500 measurements. Vertical dotted line indicates cutoff (AOD500 < 150  $\mu\text{m}$ ) for narrow angles.

**Figure 4.** False positive rate (FP) and false negative (FN) rates relative to the Reference Grader (top) and consensus between all three human graders (bottom).

500

501 **Supplementary Figure 1.** Receiver operating characteristic (ROC) curve for scleral spur  
502 prediction by the DL algorithm in Heidelberg Engineering's internal test dataset.

503 **Supplementary Figure 2.** Distribution of AOD500 as measured by the Reference Grader.

504 **Supplementary Table 1.** Intraclass correlation coefficients (ICCs) with 95% confidence intervals  
505 comparing measurements from the superior sector by the Reference Grader and a second human  
506 grader or DL algorithm.

507 **Supplementary Table 2.** Intraclass correlation coefficients (ICCs) with 95% confidence intervals  
508 comparing measurements from the temporal sector by the Reference Grader and a second human  
509 grader or DL algorithm.

510 **Supplementary Figure 3.** Representative cropped images of false positives (FP; top) and false  
511 negatives (FN; bottom) by the TPR95 algorithm based on the consensus between all three human  
512 graders. Red dots in FP images indicate predicted scleral spur location by FPR95 algorithm. Red  
513 dots in FN images indicate marked scleral spur location by the Reference Grader.

**Figure 1.** Human-human and human-machine differences in scleral spur locations. Scatter plots showing X- and Y-coordinate differences in comparison to the Reference Grader for the Expert Grader (top left), Novice Grader (bottom left), FPR4 algorithm (top right) and TPR95 algorithm (bottom right). Red dots indicate median X- and Y-coordinate differences.

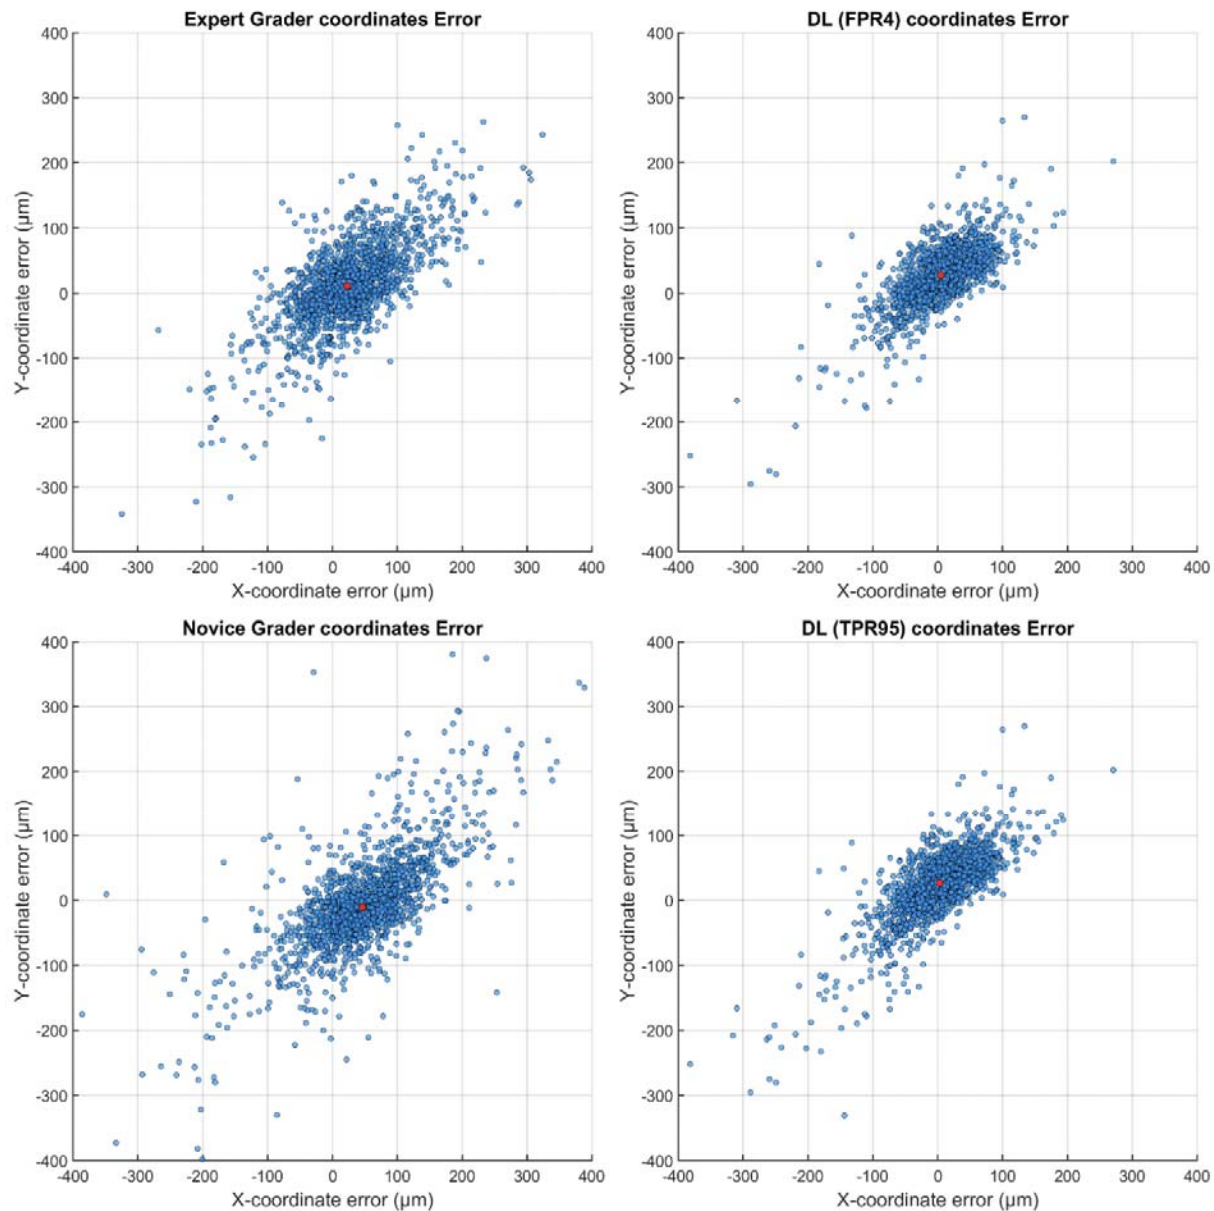

**Figure 2.** Human-human and human-machine differences in scleral spur locations. Histograms showing the Euclidean distance between scleral spur locations by the Reference Grader and Expert Grader (top left), Novice Grader (bottom left), FPR4 algorithm (top right) and TPR95 algorithm (bottom right).

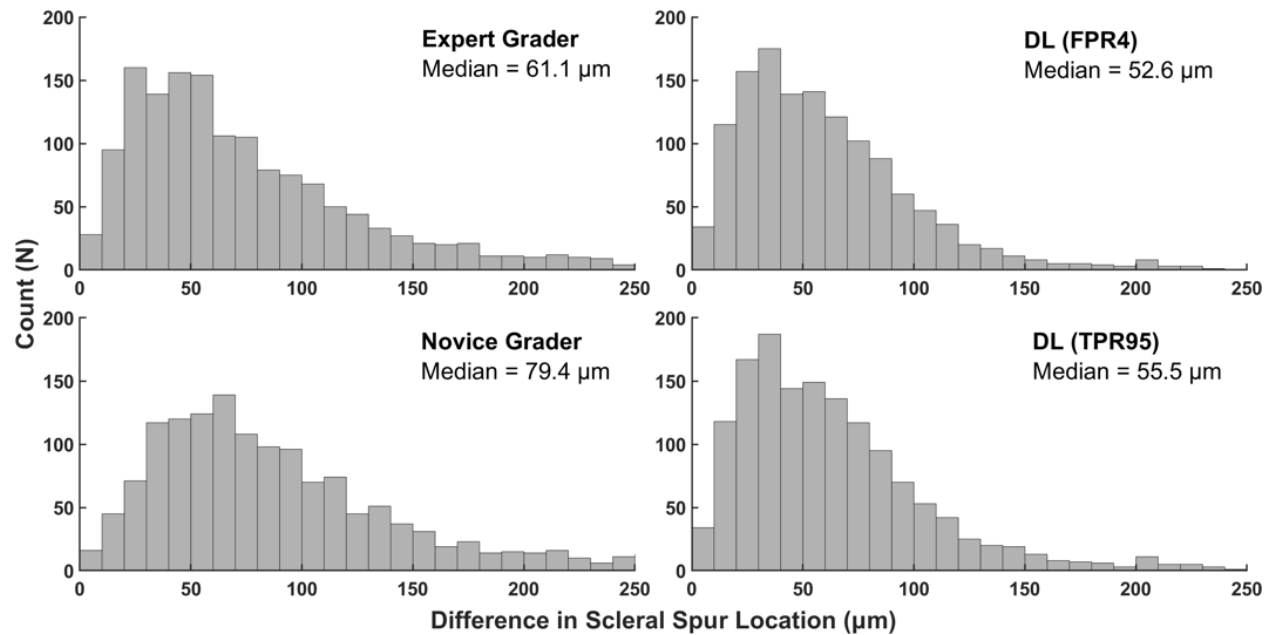

**Figure 3.** Bland-Altman plots of human-human and human-machine comparisons of AOD500 measurements. Vertical dotted line indicates cutoff (AOD500 < 150  $\mu$ m) for narrow angles.

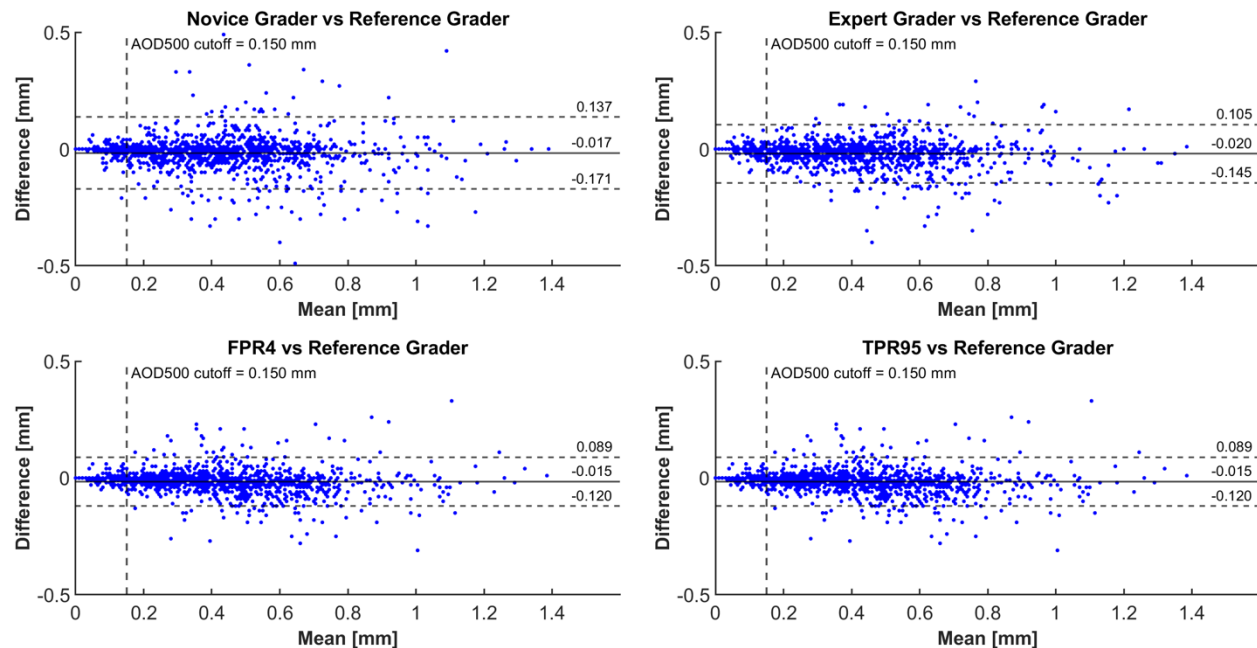



**Figure 4.** False positive rate (FP) and false negative (FN) rates relative to the Reference Grader (top) or consensus between all three human graders (bottom).

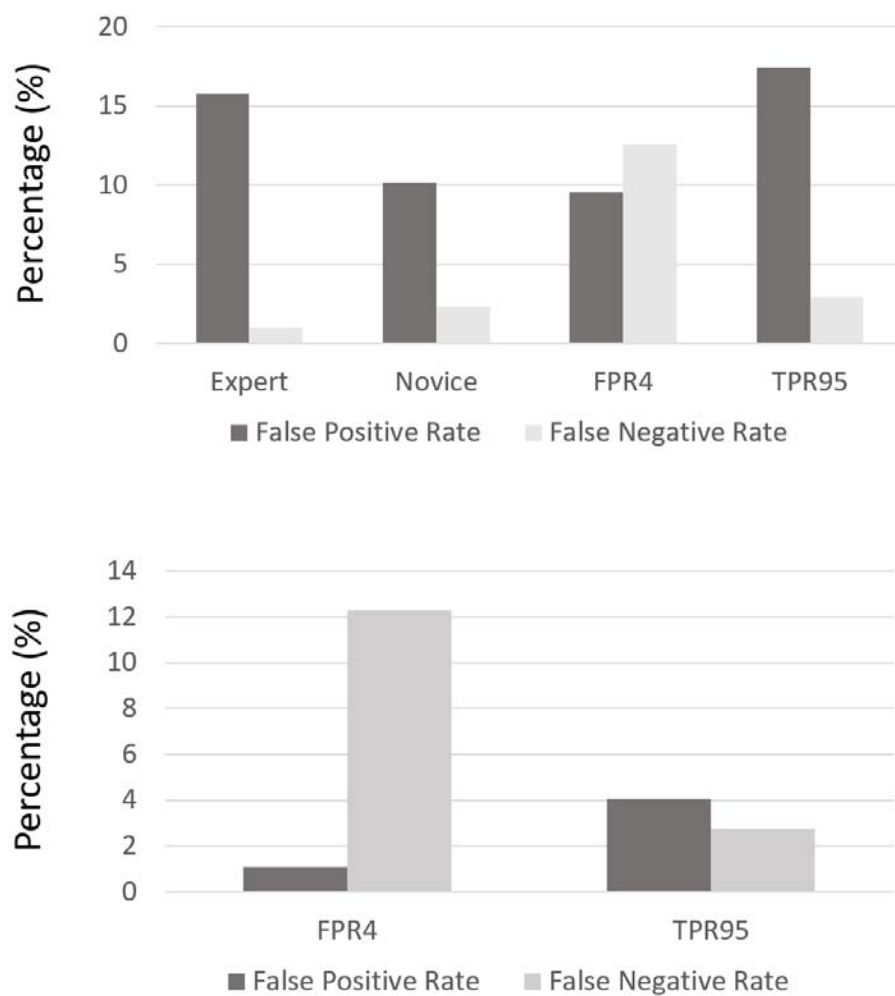

Source: http://medrxiv.stage.highwire.org/content/10.1101/2022.08.23.22279135v1.full.pdf
