# Supplementary material for: Automated Expert-level Scleral Spur Detection and Quantitative Biometric Analysis on the ANTERION Anterior Segment OCT System
Source: medRxiv preprint, doi:10.1101/2022.08.23.22279135, version 1 (2022-08-24)
Supplement: Supplementary Figure 2 [file 279135_file07.docx]

**Supplementary Figure 2.** Distribution of AOD500 as measured by the Reference Grader.


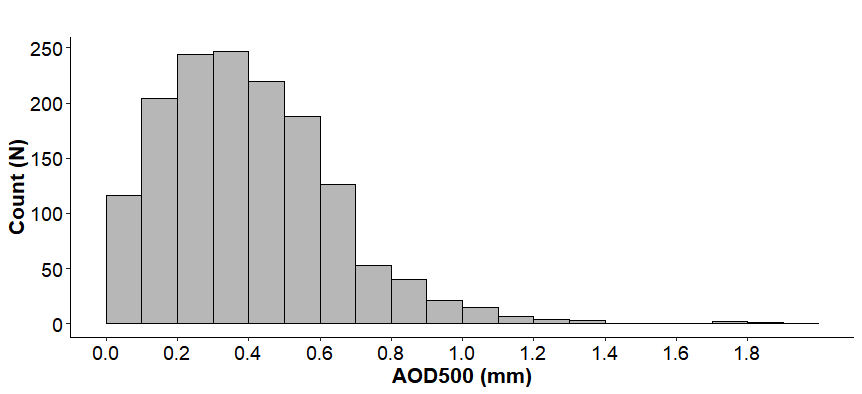


AOD500, Anterior Opening Distance 500 μm from the scleral spur.
